# Supplementary material for: The role of the secretin/secretin receptor axis in inflammatory cholangiocyte communication via extracellular vesicles
Source: PubMed Central journal article supplement (PMC5593902; doi:10.1038/s41598-017-10694-3), 2017-09-11

The role of the secretin/secretin receptor axis in inflammatory cholangiocyte  
communication via extracellular vesicles

**Keisaku Sato<sup>1,2,3</sup>, Fanyin Meng<sup>1,2,3,4,\*</sup>, Julie Venter<sup>1,2,3</sup>, Thao Giang<sup>1,2,3</sup>, Shannon  
Glaser<sup>1,2,3\*</sup>, Gianfranco Alpini<sup>1,2,3\*</sup>**

From <sup>1</sup>Research, Central Texas Veterans Health Care System, <sup>2</sup>Department of Medicine,  
Texas A&M College of Medicine, <sup>3</sup>Baylor Scott & White Digestive Disease Research  
Center, Baylor Scott & White, and <sup>4</sup>Academic Research Integration, Baylor Scott & White  
Healthcare, Temple, TX 76504.

\*Corresponding authors: Fanyin Meng, [FMeng@medicine.tamhsc.edu](mailto:FMeng@medicine.tamhsc.edu); Shannon Glaser,  
[SGlaser@medicine.tamhsc.edu](mailto:SGlaser@medicine.tamhsc.edu); Gianfranco Alpini, [GAlpini@medicine.tamhsc.edu](mailto:GAlpini@medicine.tamhsc.edu);

\*Drs. Meng, Glaser and Alpini share the senior authorship.

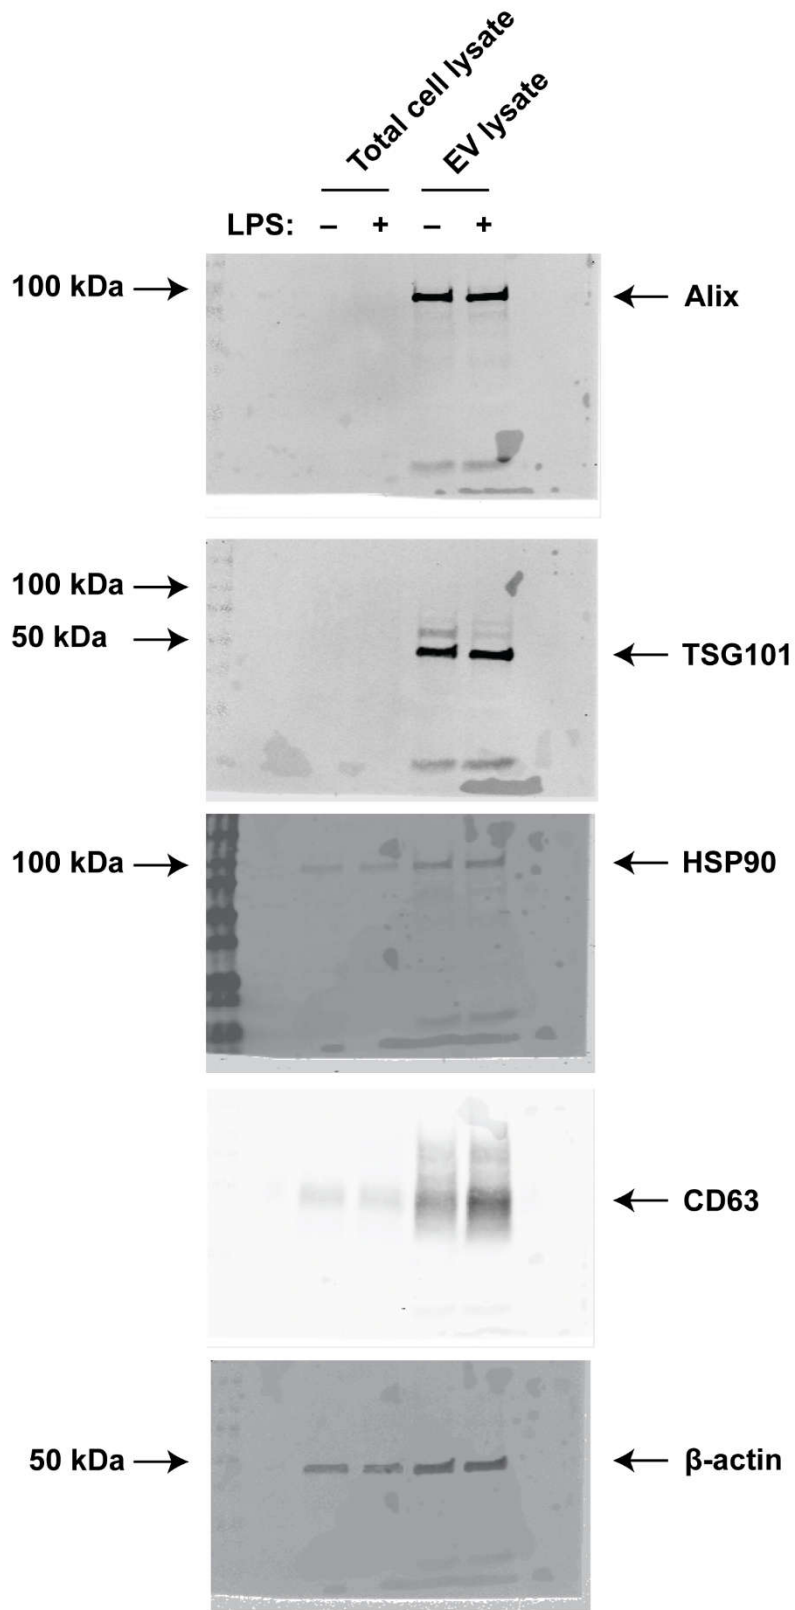

Supplement: 41598_2017_10694_MOESM1_ESM.pdf [file 41598_2017_10694_MOESM1_ESM.pdf]
